# Supplementary material for: A Rare Variant in ERF (rs144812092) Predisposes to Prostate and Bladder Cancers in an Extended Pedigree
Source: MDPI journal article supplement (doi:10.3390/cancers13102399), 2021-05-15
Supplement: s1 [file s1]

# A Rare Variant in *ERF* (rs144812092) Predisposes to Prostate and Bladder Cancers in an Extended Pedigree

Lisa Anne Cannon-Albright, Craig Carl Teerlink, Jeff Stevens, Franklin Huang, Csilla Sipeky, Johanna Schleutker, Rolando Hernandez, Julio Facelli, Neeraj Agarwal and Donald L. Trump

**Table S1.** 152 rare candidate bladder cancer predisposition variants concordant between at least one sequenced pair of bladder cancer-affected cousins.

| Chr | Start    | End      | Ref | Alt | Gene_refGene | ExonicFunc_refGene  | ExAC_ALL    |
|-----|----------|----------|-----|-----|--------------|---------------------|-------------|
| 1   | 1133010  | 1133010  | A   | G   | TTL10        | nonsynonymous SNV   | 1.00E-04    |
| 1   | 1391656  | 1391656  | G   | A   | ATAD3C       | nonsynonymous SNV   | 0.004       |
| 1   | 3413835  | 3413835  | C   | A   | MEGF6        | nonsynonymous SNV   | 8.00E-04    |
| 1   | 43316723 | 43316723 | T   | C   | ZNF691       | nonsynonymous SNV   | .           |
| 1   | 52867839 | 52867839 | C   | G   | ORC1         | nonsynonymous SNV   | 0.0041      |
| 1   | 65124401 | 65124401 | C   | A   | CACHD1       | nonsynonymous SNV   | .           |
| 1   | 1.86E+08 | 1.86E+08 | C   | T   | TPR          | nonsynonymous SNV   | 0.0036      |
| 1   | 2.03E+08 | 2.03E+08 | C   | T   | CHIT1        | nonsynonymous SNV   | 3.20E-03    |
| 1   | 2.04E+08 | 2.04E+08 | C   | T   | LAX1         | nonsynonymous SNV   | 0.0028      |
| 1   | 2.04E+08 | 2.04E+08 | C   | A   | PIK3C2B      | nonsynonymous SNV   | .           |
| 1   | 2.34E+08 | 2.34E+08 | A   | C   | KIAA1804     | nonsynonymous SNV   | 0.0024      |
| 2   | 24302345 | 24302345 | A   | G   | TP53I3       | nonsynonymous SNV   | 0.00001647  |
| 2   | 33764243 | 33764243 | C   | A   | RASGRP3      | nonsynonymous SNV   | 1.11E-05    |
| 2   | 39025499 | 39025499 | G   | A   | DHX57        | nonsynonymous SNV   | 0.0042      |
| 2   | 47709944 | 47709944 | C   | -   | MSH2         | frameshift deletion | .           |
| 2   | 1.39E+08 | 1.39E+08 | G   | A   | SPOPL        | nonsynonymous SNV   | 0.0048      |
| 2   | 1.93E+08 | 1.93E+08 | T   | C   | SDPR         | nonsynonymous SNV   | 0.0013      |
| 2   | 2.28E+08 | 2.28E+08 | A   | G   | MFF          | nonsynonymous SNV   | 0.0001      |
| 3   | 405040   | 405040   | C   | T   | CHL1         | nonsynonymous SNV   | 3.31E-05    |
| 3   | 48802779 | 48802779 | G   | A   | PRKAR2A      | nonsynonymous SNV   | 0.00001988  |
| 3   | 1.97E+08 | 1.97E+08 | G   | A   | PIGZ         | nonsynonymous SNV   | 4.00E-04    |
| 4   | 515738   | 515738   | C   | T   | PIGG         | nonsynonymous SNV   | 0.0000661   |
| 4   | 946221   | 946221   | G   | A   | TMEM175      | nonsynonymous SNV   | 0.0022      |
| 4   | 1389003  | 1389003  | G   | C   | CRIPAK       | nonsynonymous SNV   | 0.0000688   |
| 4   | 15004992 | 15004992 | C   | T   | CPEB2        | nonsynonymous SNV   | 3.20E-03    |
| 5   | 35779248 | 35779248 | A   | G   | SPEF2        | nonsynonymous SNV   | 0.0021      |
| 5   | 38481703 | 38481703 | G   | T   | LIFR         | nonsynonymous SNV   | 0.0018      |
| 5   | 52403014 | 52403014 | G   | A   | MOCS2        | nonsynonymous SNV   | 0.0005      |
| 5   | 54558723 | 54558723 | G   | A   | DHX29        | nonsynonymous SNV   | .           |
| 5   | 90059182 | 90059182 | G   | T   | ADGRV1       | nonsynonymous SNV   | 1.00E-03    |
| 5   | 1.14E+08 | 1.14E+08 | T   | C   | TRIM36       | nonsynonymous SNV   | 0.0005      |
| 5   | 1.4E+08  | 1.4E+08  | G   | C   | PCDHA10      | nonsynonymous SNV   | 0.0006      |
| 5   | 1.4E+08  | 1.4E+08  | A   | G   | PCDHB3       | nonsynonymous SNV   | .           |
| 5   | 1.81E+08 | 1.81E+08 | T   | C   | TRIM41       | nonsynonymous SNV   | .           |
| 6   | 41029294 | 41029294 | C   | A   | APOBEC2      | nonsynonymous SNV   | 0.005       |
| 6   | 42231009 | 42231009 | G   | A   | TRERF1       | nonsynonymous SNV   | 0.00002782  |
| 6   | 42905566 | 42905566 | C   | A   | CNPY3        | nonsynonymous SNV   | 0.000008241 |
| 6   | 65301693 | 65301693 | C   | T   | EYS          | nonsynonymous SNV   | .           |
| 6   | 1.14E+08 | 1.14E+08 | C   | T   | MARCKS       | nonsynonymous SNV   | 0.0006      |
| 6   | 1.14E+08 | 1.14E+08 | T   | C   | HS3ST5       | nonsynonymous SNV   | 0.0003      |
| 6   | 1.19E+08 | 1.19E+08 | C   | T   | MCM9         | nonsynonymous SNV   | 0.00006528  |

|    |          |          |   |   |                       |                   |             |
|----|----------|----------|---|---|-----------------------|-------------------|-------------|
| 6  | 1.68E+08 | 1.68E+08 | A | G | HGC6.3                | nonsynonymous SNV | 1.30E-03    |
| 7  | 73183979 | 73183979 | G | A | CLDN3                 | nonsynonymous SNV | 0.0045      |
| 7  | 77166921 | 77166921 | C | T | PTPN12                | nonsynonymous SNV | 0.00002317  |
| 7  | 81601108 | 81601108 | C | T | CACNA2D1              | nonsynonymous SNV | 0.0027      |
| 7  | 1.4E+08  | 1.4E+08  | G | A | TBXAS1                | nonsynonymous SNV | 0.0019      |
| 8  | 1.44E+08 | 1.44E+08 | A | C | THEM6                 | nonsynonymous SNV | 0.00007718  |
| 9  | 6553423  | 6553423  | C | G | GLDC                  | nonsynonymous SNV | .           |
| 9  | 17462985 | 17462985 | A | C | CNTLN                 | nonsynonymous SNV | 0.0049      |
| 9  | 1.07E+08 | 1.07E+08 | G | T | SMC2                  | nonsynonymous SNV | 3.20E-03    |
| 9  | 1.13E+08 | 1.13E+08 | C | T | AKAP2,PALM2-<br>AKAP2 | nonsynonymous SNV | 2.00E-04    |
| 9  | 1.3E+08  | 1.3E+08  | C | G | ZBTB43                | nonsynonymous SNV | 1.10E-03    |
| 9  | 1.41E+08 | 1.41E+08 | G | C | ARRDC1                | nonsynonymous SNV | 0.001       |
| 10 | 46969292 | 46969292 | G | A | SYT15                 | nonsynonymous SNV | 0.0001      |
| 10 | 95993887 | 95993887 | A | G | PLCE1                 | nonsynonymous SNV | 9.00E-04    |
| 10 | 1.01E+08 | 1.01E+08 | A | C | SLC25A28              | nonsynonymous SNV | .           |
| 10 | 1.05E+08 | 1.05E+08 | C | T | CALHM2                | nonsynonymous SNV | 0.0036      |
| 10 | 1.18E+08 | 1.18E+08 | C | A | PNLIPRP3              | nonsynonymous SNV | 0.0026      |
| 10 | 1.3E+08  | 1.3E+08  | G | A | MKI67                 | nonsynonymous SNV | 0.0049      |
| 11 | 292060   | 292060   | G | A | ATHL1                 | nonsynonymous SNV | 0.001       |
| 11 | 640112   | 640112   | A | G | DRD4                  | nonsynonymous SNV | 0           |
| 11 | 640174   | 640174   | A | G | DRD4                  | nonsynonymous SNV | 8.00E-04    |
| 11 | 1651182  | 1651182  | T | C | KRTAP5-5              | nonsynonymous SNV | 0.001       |
| 11 | 9068915  | 9068915  | C | T | SCUBE2                | nonsynonymous SNV | 0.0015      |
| 11 | 13031880 | 13031880 | A | G | RASSF10               | nonsynonymous SNV | 0.0009      |
| 11 | 1.03E+08 | 1.03E+08 | G | A | DYNC2H1               | nonsynonymous SNV | 4.20E-03    |
| 11 | 1.1E+08  | 1.1E+08  | G | A | ZC3H12C               | nonsynonymous SNV | 2.50E-05    |
| 11 | 1.18E+08 | 1.18E+08 | T | A | MPZL2                 | nonsynonymous SNV | 0.0021      |
| 11 | 1.18E+08 | 1.18E+08 | T | A | KMT2A                 | nonsynonymous SNV | 9.89E-05    |
| 11 | 1.21E+08 | 1.21E+08 | G | A | TBCEL                 | nonsynonymous SNV | 0.00004146  |
| 11 | 1.29E+08 | 1.29E+08 | C | T | ARHGAP32              | nonsynonymous SNV | 0.0012      |
| 11 | 1.3E+08  | 1.3E+08  | C | T | ADAMTS8               | nonsynonymous SNV | 0.0044      |
| 12 | 7354399  | 7354399  | G | C | PEX5                  | nonsynonymous SNV | 0.0023      |
| 12 | 91445287 | 91445287 | C | T | KERA                  | nonsynonymous SNV | 0.000008316 |
| 12 | 1.02E+08 | 1.02E+08 | C | T | CHPT1                 | nonsynonymous SNV | 0.0018      |
| 12 | 1.23E+08 | 1.23E+08 | T | G | PITPNM2               | nonsynonymous SNV | .           |
| 12 | 1.24E+08 | 1.24E+08 | C | T | ATP6V0A2              | nonsynonymous SNV | 0.0004      |
| 12 | 1.32E+08 | 1.32E+08 | G | A | MMP17                 | nonsynonymous SNV | 1.80E-03    |
| 13 | 46952078 | 46952078 | T | C | KIAA0226L             | nonsynonymous SNV | 0.0045      |
| 13 | 96540168 | 96540168 | G | A | UGGT2                 | nonsynonymous SNV | 0.0008      |
| 13 | 1.03E+08 | 1.03E+08 | T | C | CCDC168               | nonsynonymous SNV | 0.0035      |
| 14 | 71209128 | 71209128 | C | T | MAP3K9                | nonsynonymous SNV | 1.20E-03    |
| 14 | 94845944 | 94845944 | C | A | SERPINA1              | nonsynonymous SNV | 0.0023      |
| 14 | 1.01E+08 | 1.01E+08 | C | G | RTL1                  | nonsynonymous SNV | .           |
| 14 | 1.03E+08 | 1.03E+08 | C | T | TECPR2                | nonsynonymous SNV | 0.00001681  |
| 14 | 1.05E+08 | 1.05E+08 | C | G | C14orf79              | nonsynonymous SNV | 0.0017      |
| 15 | 29561606 | 29561606 | T | C | NDNL2                 | nonsynonymous SNV | 0.0011      |
| 15 | 65116504 | 65116504 | C | G | PIF1                  | nonsynonymous SNV | 0.0026      |
| 15 | 78390805 | 78390805 | C | T | SH2D7                 | nonsynonymous SNV | 0.00003318  |
| 16 | 1273558  | 1273558  | C | T | TPSG1                 | nonsynonymous SNV | 0.002       |
| 16 | 2042912  | 2042912  | A | G | SYNGR3                | nonsynonymous SNV | .           |
| 16 | 30000929 | 30000929 | A | G | TAOK2                 | nonsynonymous SNV | 0.0002      |
| 17 | 8093324  | 8093324  | C | G | C17orf59              | nonsynonymous SNV | 0.0036      |

|    |          |          |                 |   |           |                     |             |
|----|----------|----------|-----------------|---|-----------|---------------------|-------------|
| 17 | 17942915 | 17942915 | A               | C | GID4      | nonsynonymous SNV   | .           |
| 17 | 26691491 | 26691500 | CAC-<br>TGAGGTG | - | SEBOX     | frameshift deletion | 0.0009      |
| 17 | 34091112 | 34091112 | G               | A | C17orf50  | nonsynonymous SNV   | 0.0002      |
| 17 | 37262135 | 37262135 | C               | A | PLXDC1    | nonsynonymous SNV   | .           |
| 17 | 37879585 | 37879585 | A               | G | ERBB2     | nonsynonymous SNV   | 4.80E-03    |
| 17 | 38975259 | 38975259 | C               | T | KRT10     | nonsynonymous SNV   | 1.60E-03    |
| 17 | 39115095 | 39115095 | G               | A | KRT39     | nonsynonymous SNV   | 0.0002      |
| 17 | 40318398 | 40318398 | C               | T | KCNH4     | nonsynonymous SNV   | 7.00E-04    |
| 17 | 66937004 | 66937004 | G               | A | ABCA8     | nonsynonymous SNV   | 6.00E-04    |
| 17 | 72997464 | 72997464 | G               | A | CDR2L     | nonsynonymous SNV   | 0.0002      |
| 17 | 74056418 | 74056418 | T               | C | SRP68     | nonsynonymous SNV   | 0.0022      |
| 17 | 74382047 | 74382048 | TT              | - | SPHK1     | frameshift deletion | 0.0027      |
| 17 | 76046849 | 76046849 | C               | T | TNRC6C    | nonsynonymous SNV   | 1.40E-03    |
| 17 | 79987456 | 79987456 | G               | A | LRRC45    | nonsynonymous SNV   | 2.70E-03    |
| 17 | 80395194 | 80395194 | G               | A | HEXDC     | nonsynonymous SNV   | .           |
| 17 | 81052105 | 81052105 | G               | A | METRNL    | nonsynonymous SNV   | 0.0005      |
| 18 | 48190630 | 48190630 | C               | T | MAPK4     | nonsynonymous SNV   | 0.00004145  |
| 18 | 55365047 | 55365047 | T               | C | ATP8B1    | nonsynonymous SNV   | 8.00E-04    |
| 18 | 60646017 | 60646017 | C               | G | PHLPP1    | nonsynonymous SNV   | 0.0026      |
| 19 | 1468408  | 1468408  | C               | A | APC2      | nonsynonymous SNV   | 0.0008      |
| 19 | 2210451  | 2210451  | C               | G | DOT1L     | nonsynonymous SNV   | 3.20E-03    |
| 19 | 2934625  | 2934625  | C               | T | ZNF77     | nonsynonymous SNV   | 0.0018      |
| 19 | 8587708  | 8587708  | C               | A | MYO1F     | nonsynonymous SNV   | 4.00E-03    |
| 19 | 12800601 | 12800601 | G               | A | FBXW9     | nonsynonymous SNV   | 0.0001      |
| 19 | 17534540 | 17534540 | G               | T | MVB12A    | nonsynonymous SNV   | 0.0014      |
| 19 | 17945708 | 17945708 | C               | G | JAK3      | nonsynonymous SNV   | 4.00E-04    |
| 19 | 19381028 | 19381028 | C               | T | TM6SF2    | nonsynonymous SNV   | 3.00E-04    |
| 19 | 19612832 | 19612832 | A               | C | GATAD2A   | nonsynonymous SNV   | 0.00005814  |
| 19 | 33465099 | 33465099 | C               | T | C19orf40  | nonsynonymous SNV   | 5.00E-03    |
| 19 | 35760880 | 35760880 | C               | T | USF2      | nonsynonymous SNV   | 0           |
| 19 | 36018115 | 36018115 | C               | T | SBSN      | nonsynonymous SNV   | 0.0001      |
| 19 | 42753218 | 42753218 | G               | A | ERF       | nonsynonymous SNV   | 0.0005      |
| 19 | 47910643 | 47910643 | C               | T | MEIS3     | nonsynonymous SNV   | 0.0007      |
| 19 | 48305694 | 48305694 | A               | G | TPRX1     | nonsynonymous SNV   | 0.00005312  |
| 19 | 50097746 | 50097746 | G               | A | PRR12     | nonsynonymous SNV   | 0.0019      |
| 19 | 51329146 | 51329146 | C               | T | KLK15     | nonsynonymous SNV   | 2.50E-03    |
| 19 | 51649313 | 51649313 | G               | A | SIGLEC7   | nonsynonymous SNV   | 7.41E-05    |
| 19 | 51957493 | 51957493 | T               | C | SIGLEC8   | nonsynonymous SNV   | 0.0032      |
| 19 | 51957497 | 51957497 | C               | G | SIGLEC8   | nonsynonymous SNV   | 0.0026      |
| 19 | 52000192 | 52000192 | A               | G | SIGLEC12  | nonsynonymous SNV   | 0.0028      |
| 19 | 54848826 | 54848826 | C               | T | LILRA4    | nonsynonymous SNV   | 0.0038      |
| 19 | 59012675 | 59012675 | C               | T | SLC27A5   | nonsynonymous SNV   | 0.0023      |
| 20 | 33508358 | 33508358 | T               | C | ACSS2     | nonsynonymous SNV   | 0.0028      |
| 20 | 37632435 | 37632435 | G               | A | DHX35     | nonsynonymous SNV   | 0.000008237 |
| 20 | 42694674 | 42694674 | A               | C | TOX2      | nonsynonymous SNV   | .           |
| 20 | 48552981 | 48552981 | C               | G | RNF114    | nonsynonymous SNV   | .           |
| 20 | 51802198 | 51802198 | C               | T | TSHZ2     | nonsynonymous SNV   | 0.00008139  |
| 20 | 52774635 | 52774635 | A               | G | CYP24A1   | nonsynonymous SNV   | 0.0007      |
| 21 | 16015325 | 16015325 | C               | T | LOC388813 | nonsynonymous SNV   | 0.0036      |
| 21 | 34923159 | 34923159 | A               | G | SON       | nonsynonymous SNV   | .           |
| 22 | 21384032 | 21384032 | G               | A | SLC7A4    | nonsynonymous SNV   | 0.00003434  |
| 22 | 25124155 | 25124155 | C               | T | PIWIL3    | nonsynonymous SNV   | 0.0041      |

|    |          |          |   |   |              |                      |            |
|----|----------|----------|---|---|--------------|----------------------|------------|
| 22 | 29445841 | 29445841 | G | A | ZNRF3        | nonsynonymous SNV    | 0.00007248 |
| 22 | 31032952 | 31032952 | T | G | SLC35E4      | nonsynonymous SNV    | 0.004      |
| 22 | 37964703 | 37964703 | G | A | CDC42EP1     | stopgain             | 0.00005552 |
| 22 | 38129388 | 38129388 | G | A | TRIOBP       | nonsynonymous SNV    | 0.0032     |
| 22 | 38512190 | 38512190 | G | A | PLA2G6       | nonsynonymous SNV    | .          |
| X  | 1.09E+08 | 1.09E+08 | C | T | AMMECR1      | nonsynonymous SNV    | 0.0001     |
| X  | 1.24E+08 | 1.24E+08 | - | A | LOC100129520 | frameshift insertion | .-         |
